# Supplementary material for: It is “2-imino-4-thiazolidinones” and not thiohydantoins as the reaction product of 1,3-disubstituted thioureas and chloroacetylchloride
Source: Royal Society of Chemistry journal article supplement (doi:10.1039/b807775d), 2008-01-01

## Supporting Informations

**It is “2-imino-4-thiazolidinones” and not thiohydantoins as the reaction product of 1,3-disubstituted thioureas and chloroacetylchloride**

**Ramesh Yella,<sup>a</sup> Harisadhan Ghosh,<sup>a</sup> and Bhisma K. Patel<sup>\*a</sup>**

<sup>a</sup> *Department of Chemistry, Indian Institute of Technology Guwahati, Guwahati -781 039, Assam, India.*

E-mail: [patel@iitg.ernet.in](mailto:patel@iitg.ernet.in).

### List of Contents

|                               |     |
|-------------------------------|-----|
| 1. IR Spectra of 1a           | S3  |
| 2. <sup>1</sup> H NMR of 1a   | S4  |
| 3. <sup>13</sup> C NMR of 1a  | S5  |
| 4. MS of 1a                   | S6  |
| 5. COSY of 1a                 | S6  |
| 6. HETCOR of 1a               | S8  |
| 7. IR Spectra of 2a           | S9  |
| 8. <sup>1</sup> H NMR of 2a   | S10 |
| 9. <sup>13</sup> C NMR of 2a  | S11 |
| 10. HRMS of 2a                | S12 |
| 11. IR Spectra of 3a          | S13 |
| 12. <sup>1</sup> H NMR of 3a  | S14 |
| 13. <sup>13</sup> C NMR of 3a | S15 |
| 14. MS of 3a                  | S16 |
| 15. IR Spectra of 4a          | S17 |
| 16. <sup>1</sup> H NMR of 4a  | S18 |
| 17. <sup>13</sup> C NMR of 4a | S19 |
| 18. MS of 4a                  | S20 |
| 19. IR Spectra of 5a          | S21 |
| 20. <sup>1</sup> H NMR of 5a  | S21 |
| 21. H NMR of 5a (expanded)    | S23 |
| 22. <sup>13</sup> C NMR of 5a | S24 |
| 23. MS of 5a                  | S25 |

|                                |     |
|--------------------------------|-----|
| 24. IR Spectra of 6a           | S26 |
| 25. <sup>1</sup> H NMR of 6a   | S27 |
| 26. <sup>13</sup> C NMR of 6a  | S28 |
| 27. MS of 6a                   | S29 |
| 28. IR Spectra of 7a           | S30 |
| 29. <sup>1</sup> H NMR of 7a   | S31 |
| 30. <sup>13</sup> C NMR of 7a  | S32 |
| 31. MS of 7a                   | S33 |
| 32. IR Spectra of 8a           | S34 |
| 33. <sup>1</sup> H NMR of 8a   | S35 |
| 34. <sup>13</sup> C NMR of 8a  | S36 |
| 35. IR Spectra of 9a           | S37 |
| 36. <sup>1</sup> H NMR of 9a   | S38 |
| 37. <sup>13</sup> C NMR of 9a  | S39 |
| 38. IR Spectra of 10a          | S40 |
| 39. <sup>1</sup> H NMR of 10a  | S41 |
| 40. <sup>13</sup> C NMR of 10a | S42 |
| 41. MS of 10a                  | S43 |
| 42. IR Spectra of 11a          | S44 |
| 43. <sup>1</sup> H NMR of 11a  | S45 |
| 44. <sup>13</sup> C NMR of 11a | S46 |
| 45. MS of 11a                  | S47 |
| 46. IR Spectra of 12a          | S48 |
| 47. <sup>1</sup> H NMR of 12a  | S49 |
| 48. <sup>13</sup> C NMR of 12a | S50 |
| 49. MS of 12a                  | S51 |

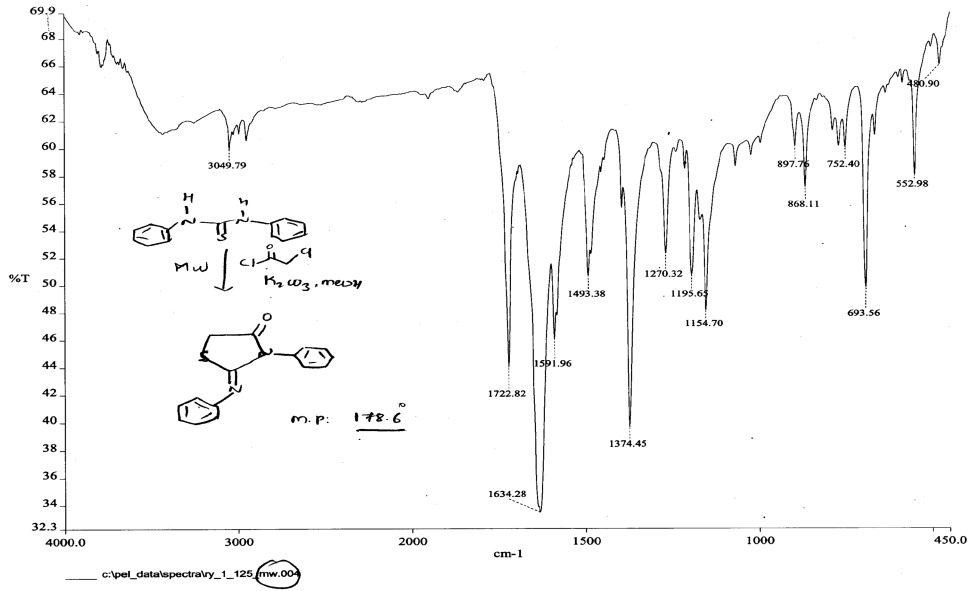

RV\_1125

exp1 std1h

```
SAMPLE DEC. & VT
date Apr 24 2008 dfrq 399.853
solvent CDC13 dn H1
file exp dpr 30
ACQUISITION dof 0
effq 399.853 dm nnn
in H1 dm c
at 1.883 dmf PROCESSING 200
np 23936
sv 6005.0 wtf file
fb not used proc ft
bs 4 fn not used
tpwr 57
pw 7.0 wsr
p1 1.000 wexp
tot 0 wbs
nt 32 wnt
ct 32
elock n
gain not used
FLAGS n
ll n
ln n
dp DISPLAY y
sp -471.4
wp 5042.6
vs 53
sc 0
wc 250
hznm 20.17
fs 996.94
ffl 369.8
rff 0
ln 8
ths 100.000
nm cdc ph
```

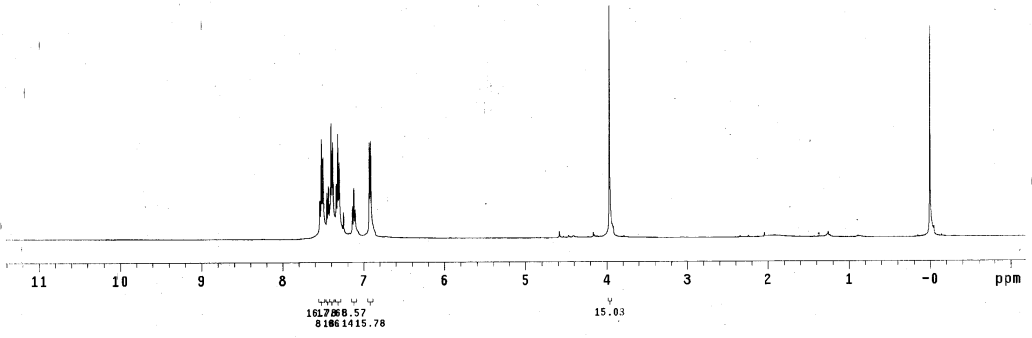

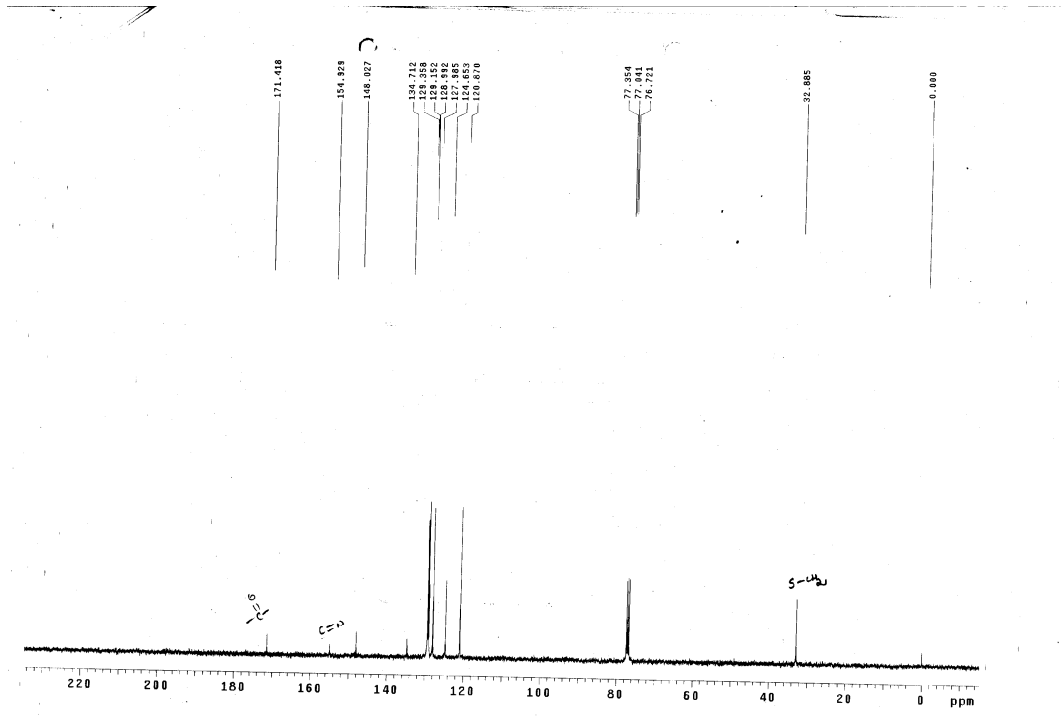

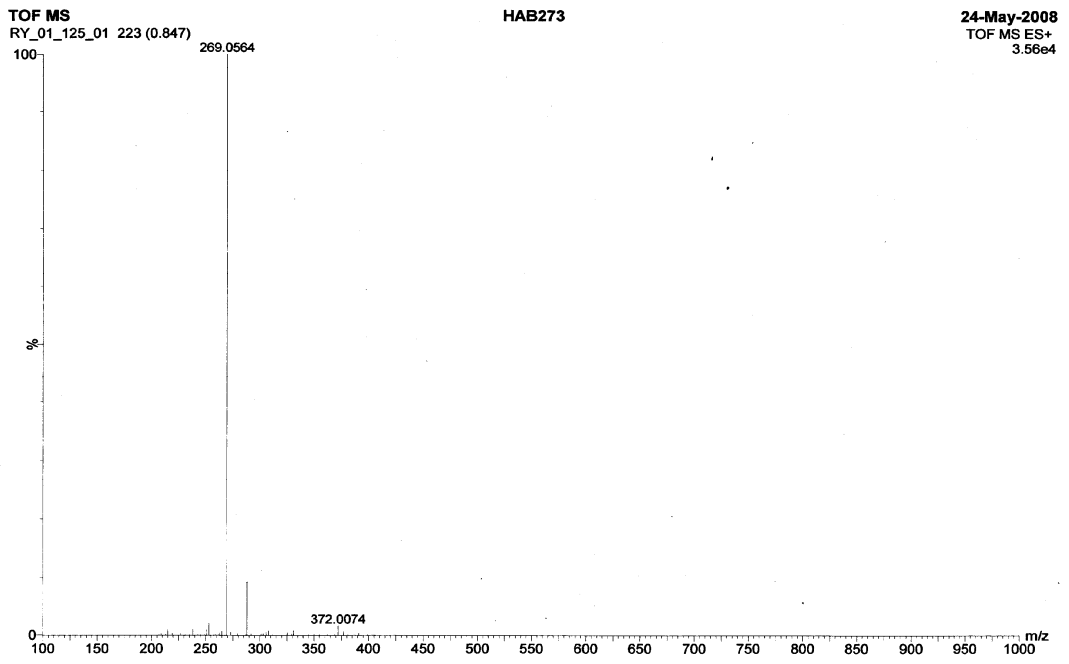

Archive directory: /export/home/patel/vnmrsws/data  
Sample directory: patel\_25May2008  
F11b: COSY

Pulse Sequence: COSY  
Solvent: CDCl3  
Ambient Temperature  
Mercury-400BB "litg400cif"

Relax. delay 1.000 sec  
Acq. time 0.213 sec  
Width 4897.7 Hz  
SD Width 4897.7 Hz  
2 repetitions  
128 increments  
OBSERV1 H1 399.8509678 MHz  
DATA PROCESSING  
Sg. sine bell 0.107 sec  
F1 DATA PROCESSING  
Sg. sine bell 0.027 sec  
F1 size 2048 x 2048  
Total time 6 min. 59 sec

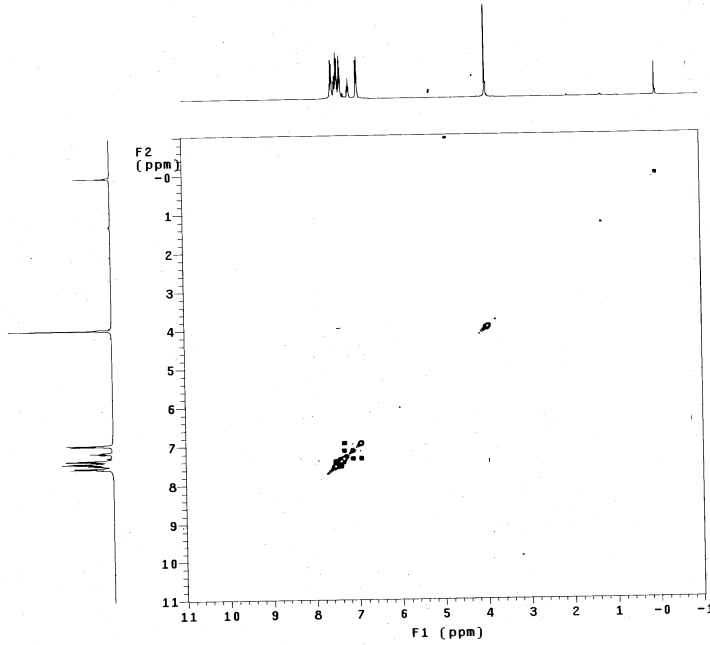

Archive directory: /export/home/patel/vmrsys/data  
Sample directory: patel\_25May2008-02:49:36  
File: HETCOR

Pulse Sequence: HETCOR  
Solvent: CDCl3  
Ambient temperature  
Mercury-40005 "litg400ctf"

Relax. delay 1.000 sec  
Acq. time 0.049 sec  
Width 21008.4 Hz  
SD Width 6288.8 Hz  
S4 repetitions  
2 x S12 increments  
OBSERVE C13, 100.5425807 MHz  
DECUPLE H1, 399.8533625 MHz  
Power 42 dB  
On during acquisition  
off during delay  
WALTZ-16 modulated  
DATA PROCESSING  
Gauss apodization 0.022 sec  
F1 DATA PROCESSING  
Gauss apodization 0.074 sec  
F1 size 2048 x 4096  
Total time 20 hr, 50 min, 14 sec

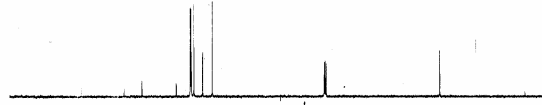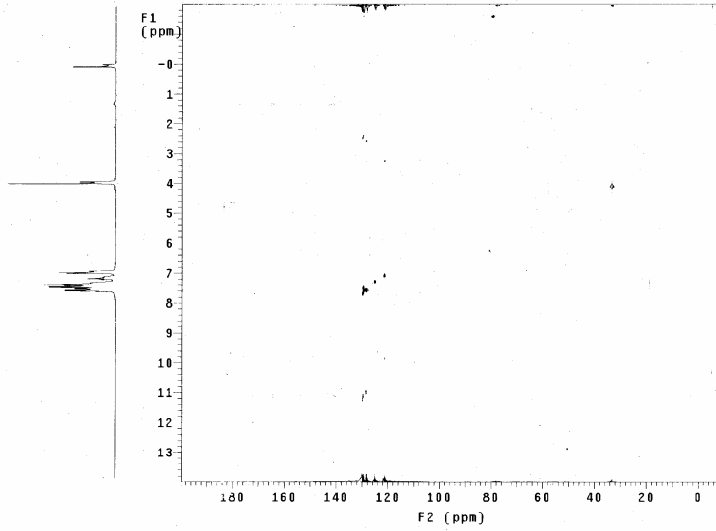



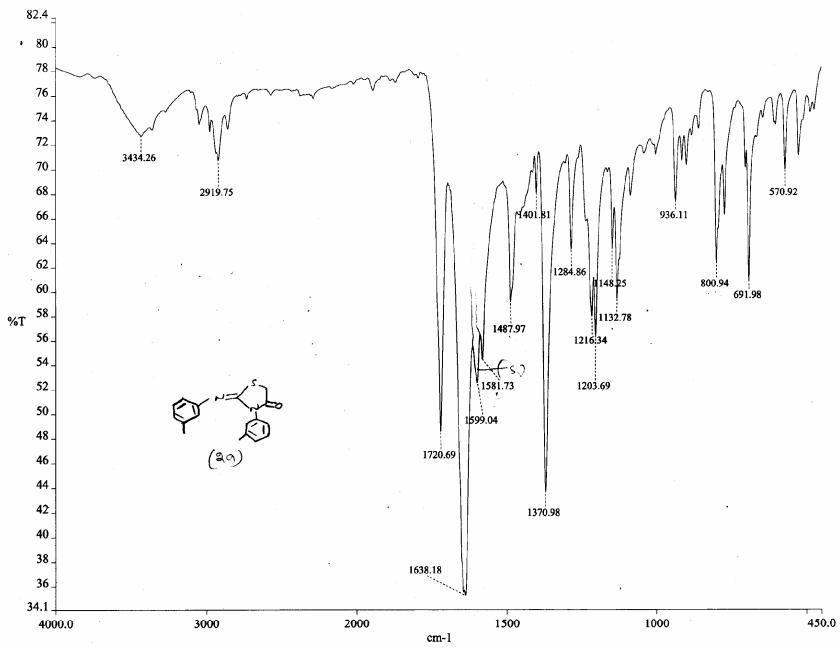

c:\pel\_data\spectra\rameshry\_1\_173\_3 methyl.sp - 3, methyl symm

RY\_173  
exp1 s2pul

| SAMPLE            |                     | SPECIAL |          |
|-------------------|---------------------|---------|----------|
| date              | Jun 10 2008         | temp    | not used |
| solvent           | CDCl3               | gbin    | not used |
| file              | /export/home/~ spin | dot     | not used |
| patel/Patel_Ry_1_ | hst                 | 0.008   |          |
| 72.116            | ppm                 | 15.700  |          |
| ACQUISITION       |                     | atfa    | 20.000   |

| ACQUISITION |          | FLAGS |       |
|-------------|----------|-------|-------|
| sv          | 6388.8   |       |       |
| at          | 1.888    | f1    | n     |
| np          | 25528    | in    | n     |
| fo          | not used | dp    | y     |
| bs          | 4        | hs    | nm    |
| at          | 1.600    |       |       |
| nt          | 32       | lb    | 0.10  |
| ct          | 32       | fn    | 65536 |

| TRANSMITTER |         | DISPLAY |        |
|-------------|---------|---------|--------|
| tn          | H1      | sp      | -514.4 |
| sfrq        | 399.853 | wp      | 4928.4 |
| tof         | 362.8   | rfl     | 783.3  |
| tpwr        | 57      | rfd     | 0      |
| pw          | 9.850   | cp      | 129.1  |
| deco        |         | tp      | -98.4  |

| DECOUPLER |       | PLOT |        |
|-----------|-------|------|--------|
| dn        | C13   |      |        |
| dof       | 0     | wc   | 250    |
| dm        | nmh   | sc   | 0      |
| dma       | C     | vs   | 25     |
| dprf      | 50    | th   | 6      |
| dnt       | 15900 | nm   | cdc ph |

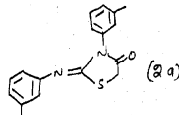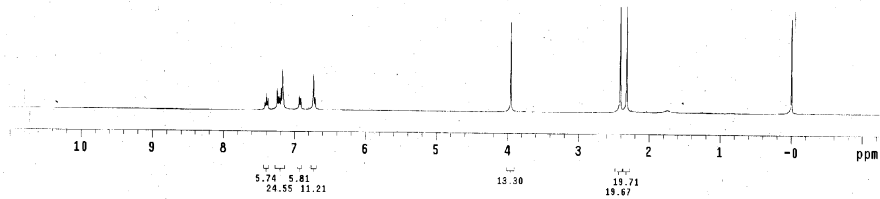

RV\_1\_173\_13C  
ekpl std13c

```
SAMPLE          DEC. & VT
date Jun 23 2008 dfrq 399.853
solvent CDCl3  sn W1
fil exp dpwr 42
ACQUISITION    exp dpwr 0
sfrq 100.552  dm  yyy
tn C13  dm  8900
et 1.158  dmf
np 58868  PROCESSING
sw 25000.0  lb 1.00
ds 43000  proc
spwr 64  wfrile ft
pw 8.7  in  not used
qt 0  wefr
sor 0  wekp
ns 10000  wds
ct 10000  wnt
alock n
gain not used
FLAGS
fl n
in n
dp y
DISPLAY
sp 24778.8
wg 24899.2
vs 24
sc 0
wc 250
hzmm 100.00
ls 500.00
rf1 10745.2
rf2 7754.3
th 2
ns 100.000
nm no ph
```

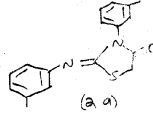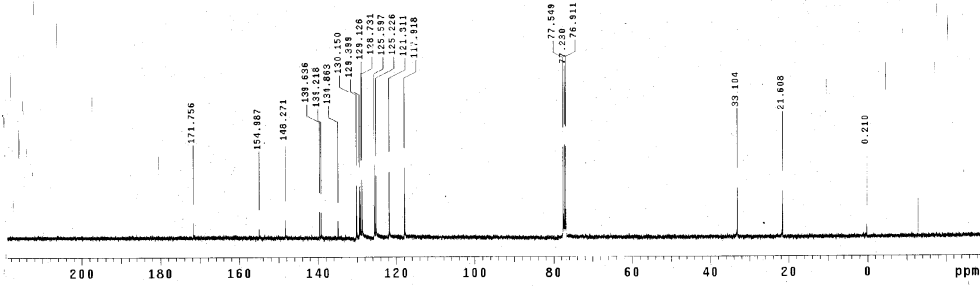

-S12-

TOF MS  
RAMESH\_03 273 (11.263)

HAB273

16-Jun-2008  
2: TOF MS ES+  
5.83e5

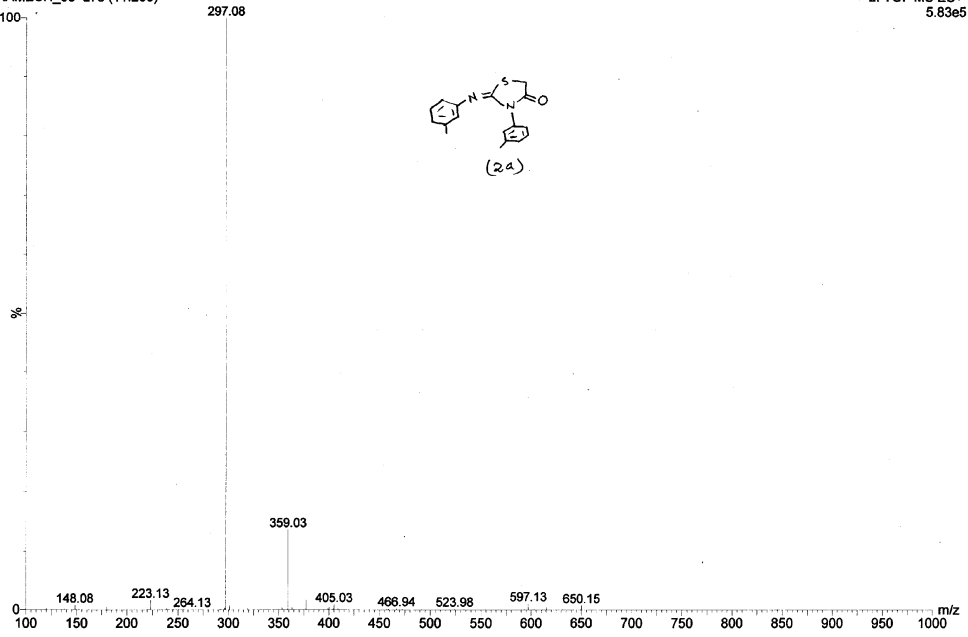

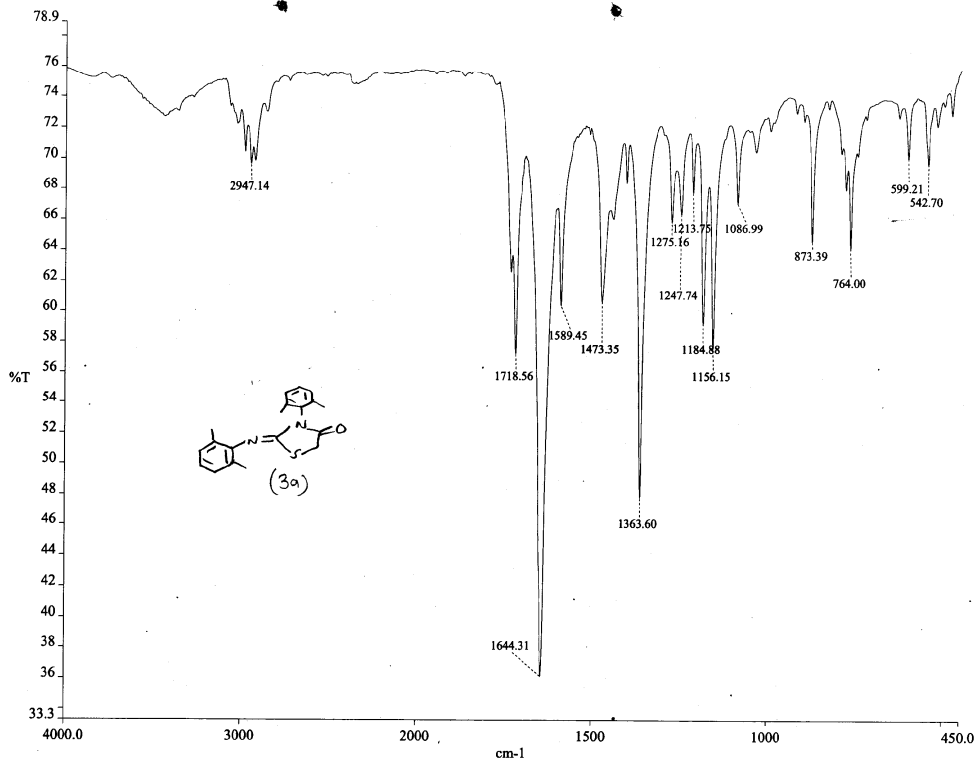

c:\pel\_data\spectra\ameshly\_1\_171\_2,6 dimethyl symm.sp - 2,6 dimethyl symm

RY\_1\_171  
exp1 s2pu1

| SAMPLE      |             | SPECIAL |          |
|-------------|-------------|---------|----------|
| date        | Jun 6 2006  | temp    | not used |
| solvent     | CDCl3       | gain    | not used |
| file        | exp         | spin    | not used |
| ACQUISITION |             | hst     | 0.000    |
| sv          | 6558.6      | wid     | 13.700   |
| at          | 1.988       | atfa    | 20.000   |
| ap          | 25528       | FLDS    | n        |
| pb          | not used    | l1      | n        |
| ss          | 0           | in      | 0        |
| sl          | 1.000       | op      | y        |
| st          | 32          | hs      | nm       |
| ci          | TRANSMITTER | 32      | lb       |
| tr          | 398.853     | fn      | 65536    |
| tof         | 382.8       | sp      | -886.9   |
| tpw         | 57          | wp      | 6283.5   |
| pw          | 0.850       | rfl     | 887.3    |
| de          | DECOUPLER   | 0       | rfp      |
| dn          | C13         | rp      | 133.9    |
| dof         | 0           | tp      | -36.3    |
| dm          | nm          | uc      | 250      |
| dmp         | 50          | sc      | 0        |
| dof         | 15900       | vc      | 66       |
| dm          |             | th      | 20       |
| dm          |             | cdc     | ph       |

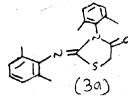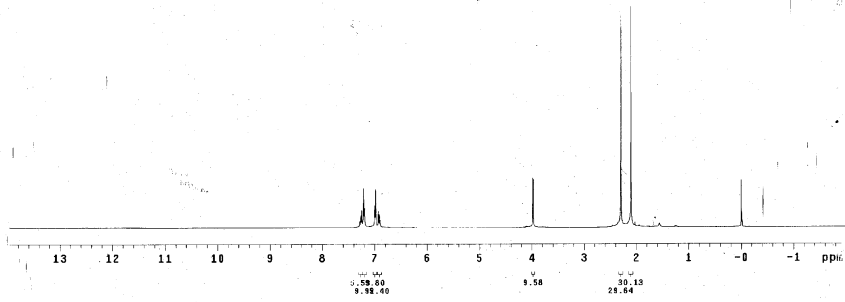

```
RY_1_171_13C
omp1 c2pu1
SAMPLE
date Jun 7 2008 temp not used
solvent CDC13 gain not used
file exp spin not used
ACQUISITION exp 0.008
sw 25125.6 pw90 20.000
et 1.189 d1FA 35.000
rb 00270 f1 FLAGS n
fs 13000 f2 n
bs 16 f3 n
dl 1.800 dp v
rl 2000 hc PROCESSING mn
ct 592 1b 2.00
tn C13 fn 65536
sTn 100.354 DISPLAY
tof 1536.3 sp -1511.5
tpwr 61 wp 25124.8
pw 9.300 rf1 9277.2
DECOUPLER rf2 7754.8
dn H1 fp -42.5
dof 0 fp PLOT -349.0
dm v wc 250
dpr 42 cc 0
dhf 8900 vs 26
nm no ph 2
```

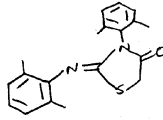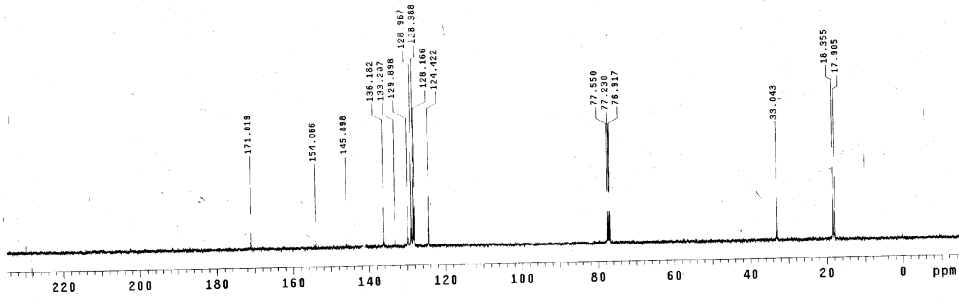

TOF MS

RAMESH\_2,6\_dimethyl 243 (10.018)

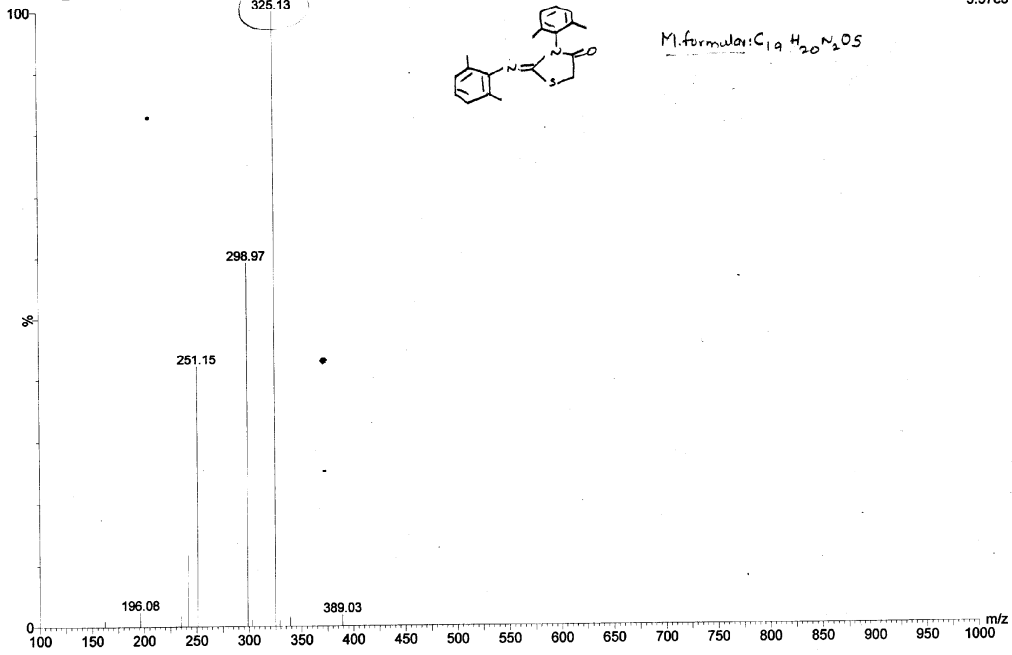

HAB273

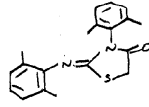

M. formula: C<sub>19</sub>H<sub>20</sub>N<sub>2</sub>O

16-Jun-2008  
2: TOF MS ES+  
3.57e3



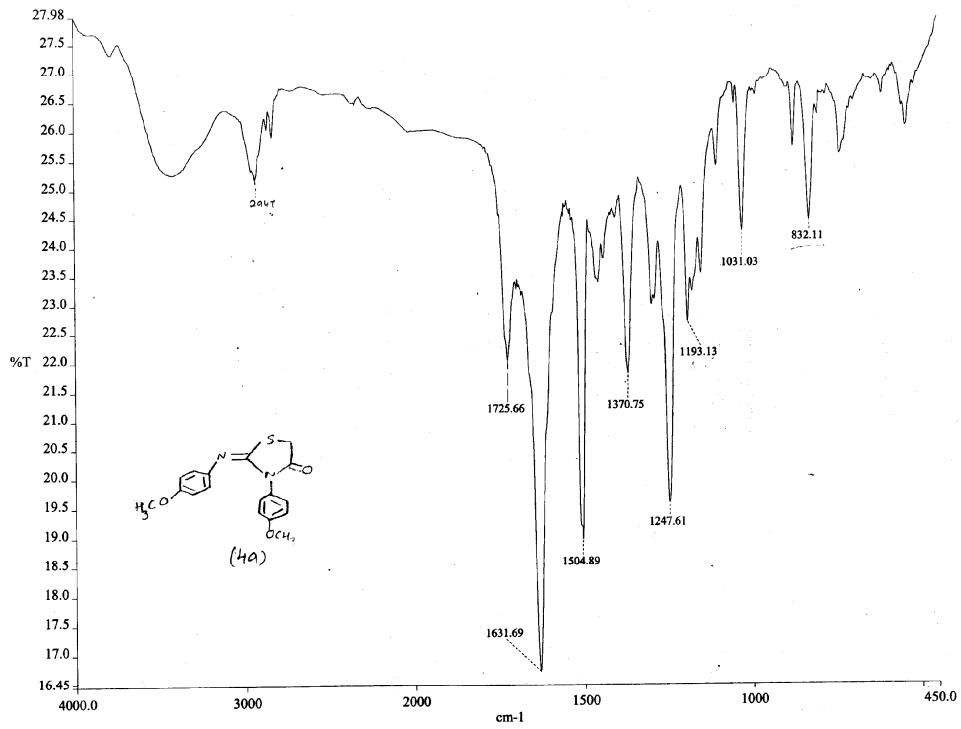

c:\pel\_data\spectra\rameshry\_1\_165.sp



```
RV_1_185_13C
expt1 std13c
SAMPLE DEC. & VT
date May 30 2000 dfrq 399.693
solvent CDCl3 de HI
fil ACQUISITION exp gpwr 42
sfra 100.552 da dot 0
tn C13 dm yyy 0
st 1.198 dmf 8900
np 50868 PROCESSING
sw 25000.0 lb 1.00
fb 13800 wtflls ft
bs 32 proc
tpwr 61 fn not used
pw 8.7
d1 0 werr
tof 0 wexp
nt 3000 wbs
ct 3000 wnt
atck n
gain not used
FLAGS
fl n
in n
ds y
DISPLAY
sp 2300.4
wp 24999.2
vs 27
sc 0
wc 250
Hzmm 100.00
is 500.00
rft 18752.1
rfp 7784.3
tn 2
ins 100.000
nm no ph
```

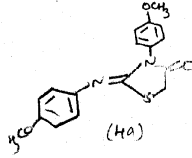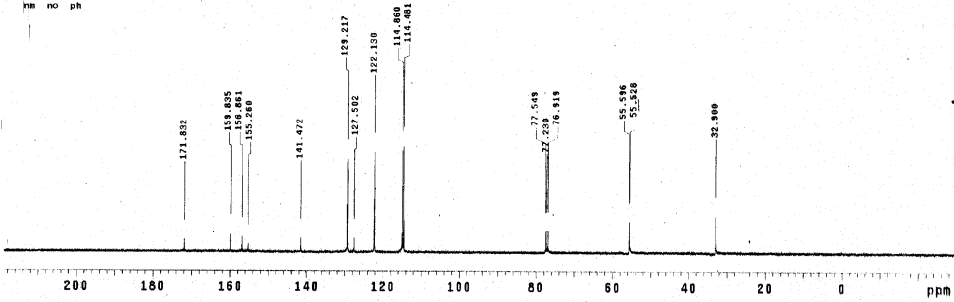

TOF MS  
RAMESH\_02 211 (8.699)

HAB273

16-Jun-2008  
2: TOF MS ES+  
6.04e5

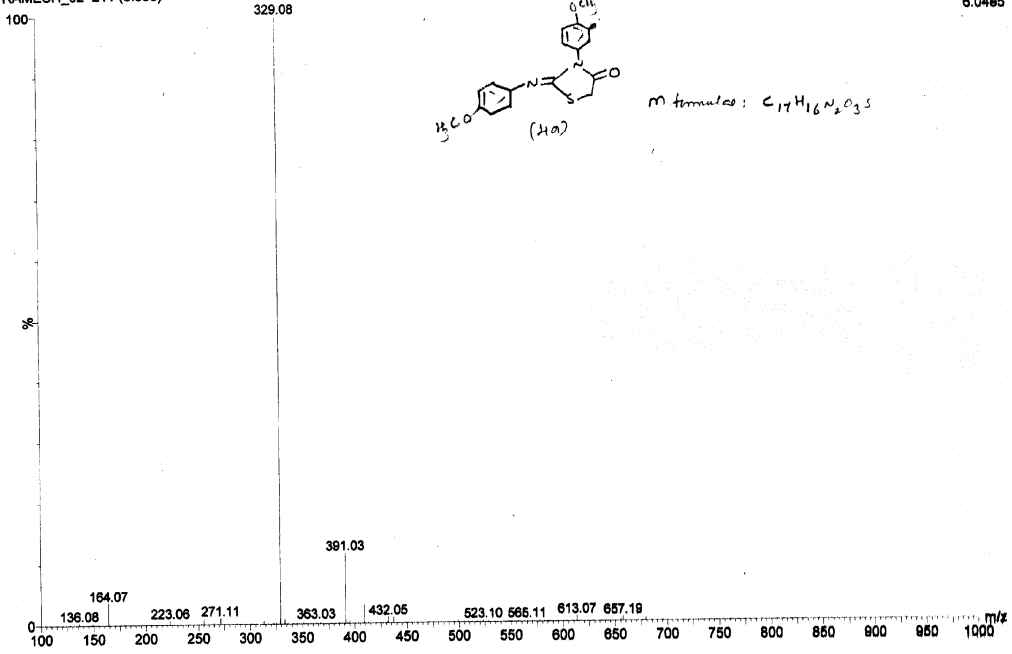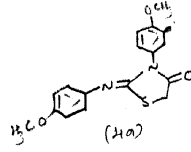

m formula: C<sub>17</sub>H<sub>16</sub>N<sub>2</sub>O<sub>3</sub>S

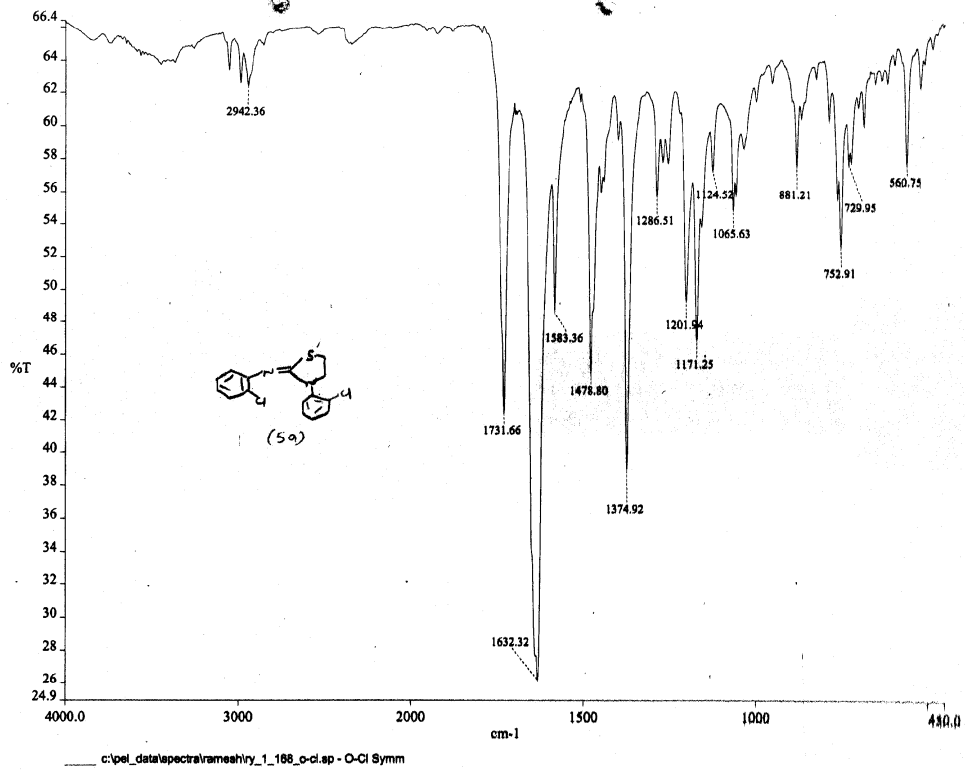

```
RY_1_168
expl stdin
SAMPLE
date Jun 4 2008 dfrq DEC. & VT 399.853
solvent CDCl3 dn H1
file ACQUISITION exp dpwr 30
sfrq 399.853 dm nnn
in 31 dem C
at 1.993 daf PROCESSING 200
np 22936
sw 6006.0 wtfile
fb not used proc ft
bk 4 fn not used
tpr 57
pw 7.0 werr
d1 1.000 wexp
sof 0 wds
nt 32 wnt
cl 32
clock n
gain not used
ll FLASK n
in n
dp DISPLAY y
sp -866.3
wp 8005.6
vc 38
sc 0
wc 250
hzma 24.02
ls 1280.19
rfi 988.7
rfp 0
sh 20
ins 100.000
nm cdc ph
```

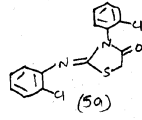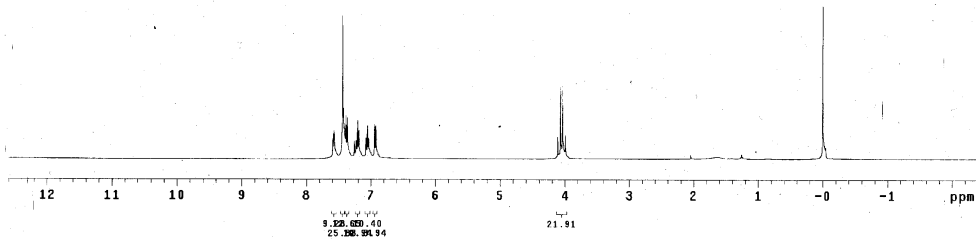

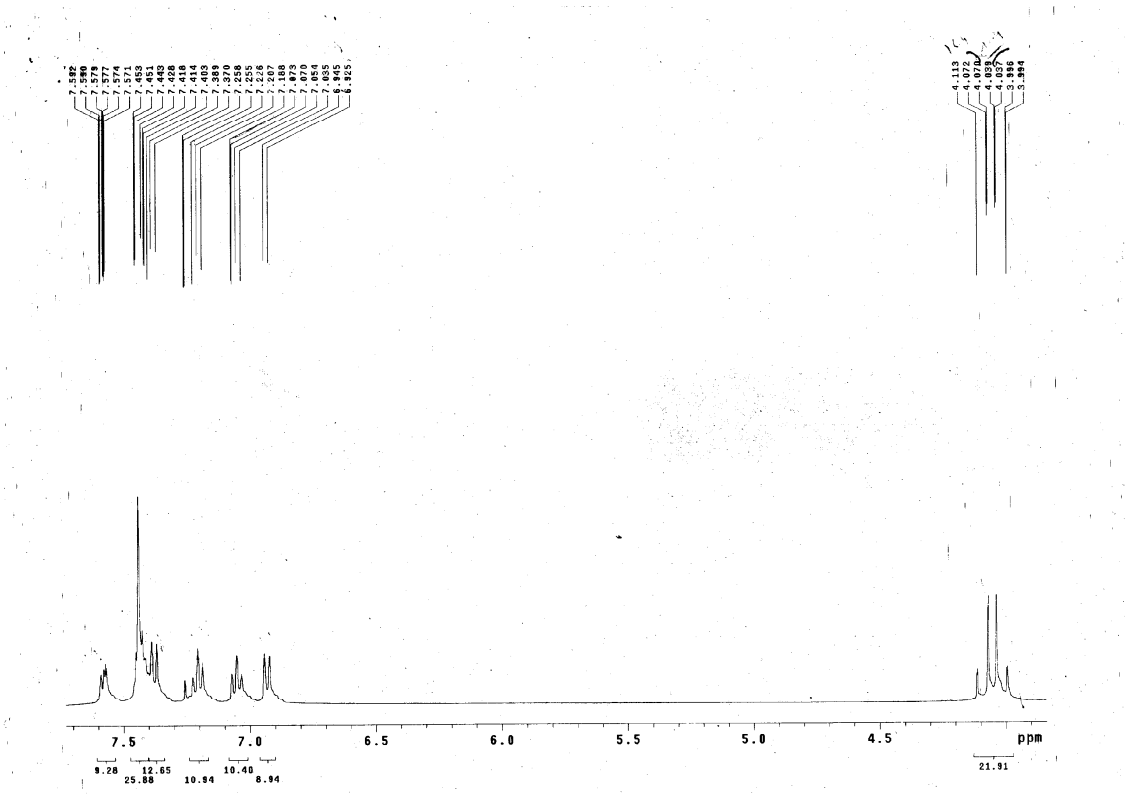

RY\_1\_168\_13C  
expl std13c

```
SAMPLE DEC. & VI  
date Jun 4 2008 dfrq 399.853  
solvent CDC13 dn 42  
file ACQUISITION exp dpr 0  
sfrq 100.552 dm yyy  
in C13 dmm w  
at 1.199 dmf 8900  
np 53908 PROCESSING  
sw 25000.0 lb 1.00  
fb 13800 wfile  
bs 16 proc ft  
tpwr 8.7 fn not used  
pv 0  
di 0 werr  
lof 0 wexp  
nt 3000 wbs  
ct 3000 wnt  
atock n  
gain not used  
FLAGS n  
il n  
in n  
op y  
DISPLAY  
sp -2361.1  
w0 24999.2  
vs 29  
sc 0  
wc 250  
h2mm 180.00  
ls 500.00  
rfi 10746.8  
rfp 7764.9  
th 1  
ins no ph 100.000
```

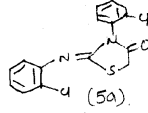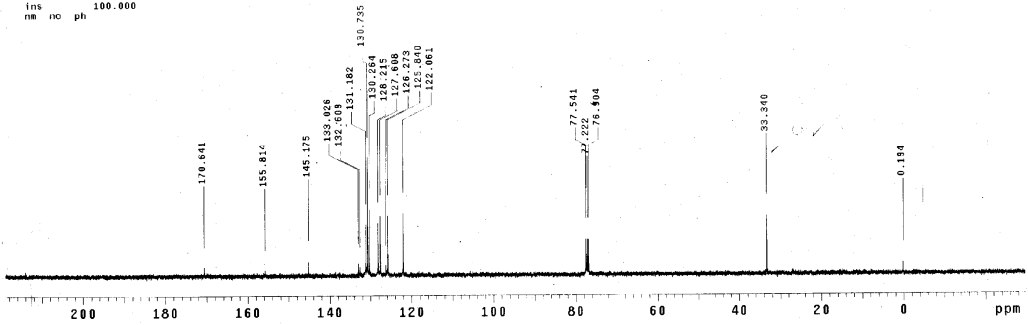



TOF MS  
RAMESH\_O\_Cl-242 (9.981)

HAB273

16-Jun-2008  
2: TOF MS ES+  
4.43e4

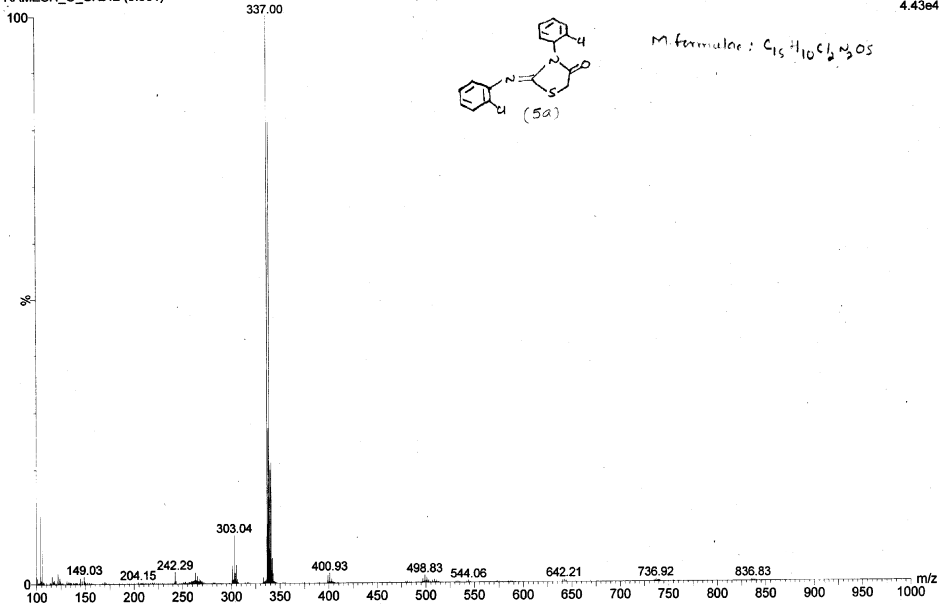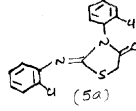

M. formulae:  $C_{15}H_{10}Cl_2N_2OS$

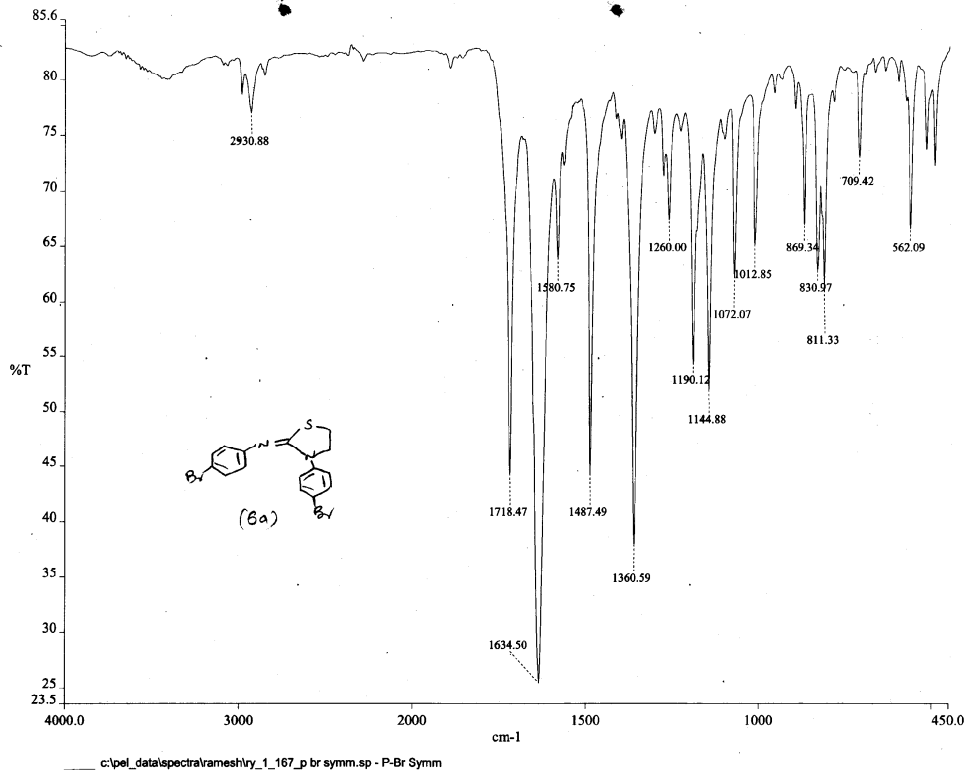

RY\_1167  
:expl 'std01n  
SAMPLE DEC. & VT  
date Jun 3 2008 dfrq 399.853  
solvent CDCl3 dm H1  
file ACQUISITION exp dpwr 30  
in H1 dm 0  
sfra 399.853 dm min  
at 1.953 dmf 200  
np 2398 PROCESSING  
sw 6008.0 wftlb  
fb not used proc ft  
bc 4 fr not used  
spwr 57  
pr 7.0 verr  
gi 1.000 wexp  
scr 0 wds  
nt 32 wnt  
ct 32  
alock n  
gain not used  
ii FLAGS n  
in n  
dp DISPLAY y  
sp -967.8  
wp 6005.6  
vs 31  
sc 0  
wc 250  
hzmm 24.02  
ls 561.22  
rfi 968.1  
rfp 0  
th 22  
inc 100.000  
nm cdc ph

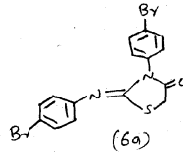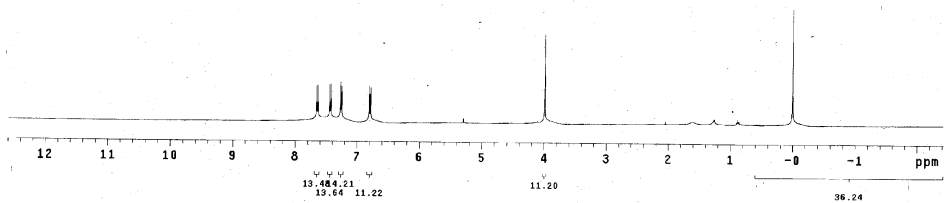

```
RY_1_167_13C
exp1 std13c
SAMPLE          DEC. & VI
date            Jun 3 2008  dfrq 399.853
solvent         CDCl3      dm  H1
file            CDC13      dm  40
ACQUISITION    exp  dpr  40
exp1            exp  dof  0
frrq           100.552  dm  yyy
in             C13      dm  w
at             1.189   dm  9900
np             53805   dm  PROCESSING
sw             25000.0 lb  1.00
fd             13800   att110
hs             16     proc  ft
lpar           61     fm  not used
pw             6.7
qt             0     wexp
lor            0     wexp
ct             2000   wds
alock          n     wnt
delin         not used
FLAGS
f1            n
in            n
dp            9
DISPLAY
sp            2380.2
wp            2499.2
vs            50
sc            0
wc            250
hzam         100.00
fs           380.00
rf           10746.0
rfp          7764.5
lh            4
ins          100.000
ms no ph
```

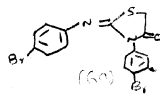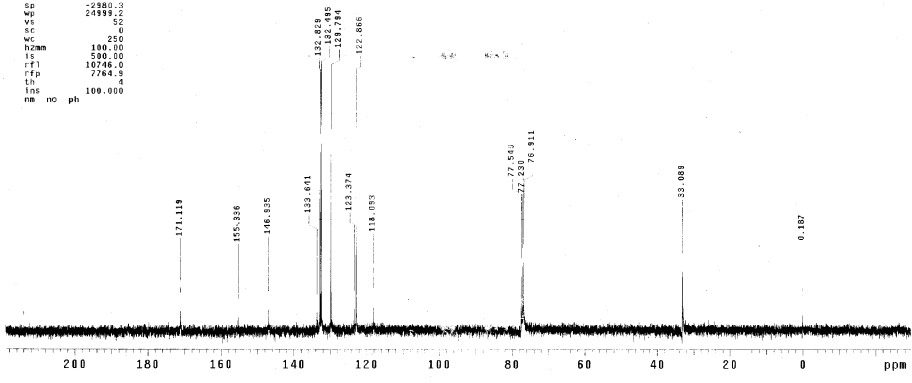

TOF MS  
RAMESH\_P\_Br 180 (7.417)

HAB273

16-Jun-2008  
2: TOF MS ES+  
523

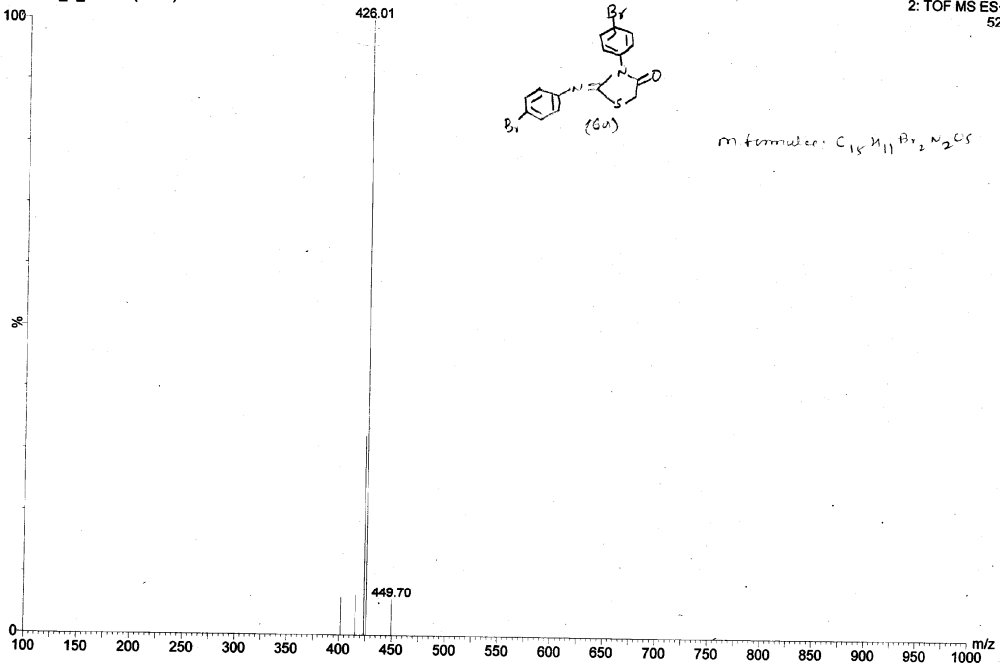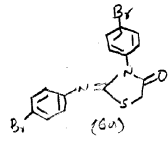

m formula: C<sub>18</sub>H<sub>11</sub>Br<sub>2</sub>N<sub>2</sub>S

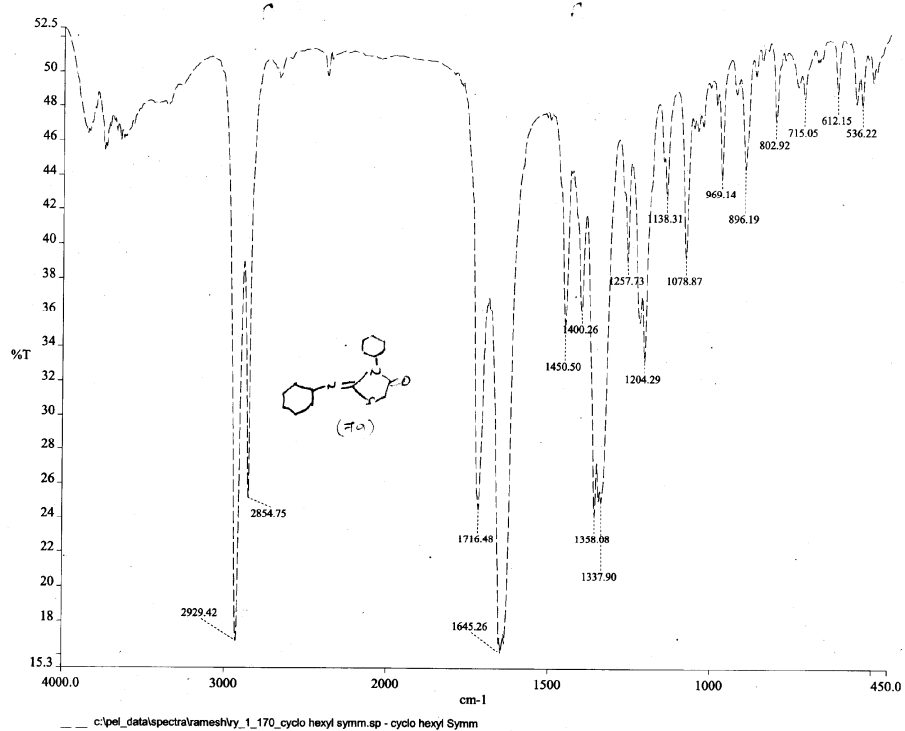

RV\_L170  
exp1 s2pu1

| SAMPLE      |            | SPECIAL    |          |
|-------------|------------|------------|----------|
| date        | Jan 7 2000 | temp       | not used |
| solvent     | CDCl3      | gain       | not used |
| file        |            | spin       | not used |
| ACQUISITION |            | exp        | 1        |
| sv          | 6388.8     | pv90       | 19.700   |
| sk          | 1.888      | alpha      | 20.000   |
| sp          | 25528      | FLAGS      |          |
| fb          | not used   | fl         | n        |
| bs          | 4          | in         | n        |
| d1          | 1.000      | dp         | y        |
| nt          | 32         | ns         | m        |
| ct          |            |            |          |
| TRANSMITTER |            | PROCESSING |          |
| tn          | M1         | fb         | 8.10     |
| sfrq        | 389.853    | fn         | 65536    |
| lof         | 382.8      | sp         | -239.3   |
| tpwr        | 1.52       | wp         | 3681.8   |
| pw          | 9.856      | rfl        | 3688.0   |
| DECOUPLER   |            | rff        | 2894.3   |
| dn          | C13        | fp         | 123.4    |
| dof         | 0          | fp         | -98.8    |
| dm          | mm         | PLOT       |          |
| dwm         | c          | wc         | 250      |
| dper        | 50         | sc         | 0        |
| dprf        | 15800      | vs         | 64       |
|             |            | tn         | 20       |
|             |            | rm         | cdc ph   |

SR

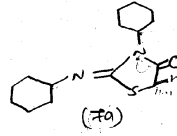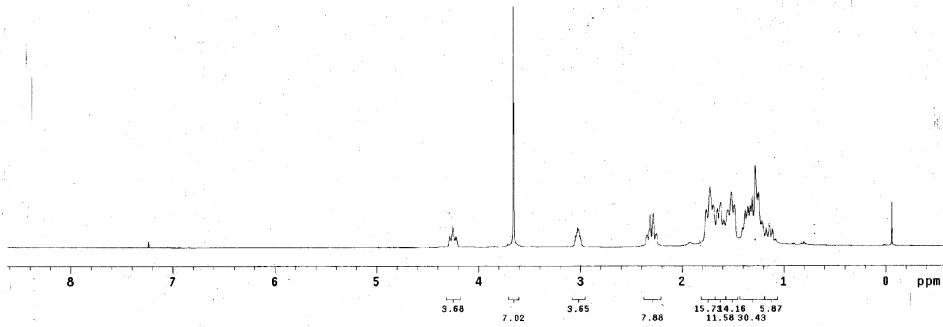

ky\_1\_170\_13C  
exp1 s2pu1

| SAMPLE      |            | SPECTAL    |          |
|-------------|------------|------------|----------|
| date        | Jun 7 2008 | temp       | not used |
| solvent     | CDCl3      | gain       | not used |
| file        |            | spin       | not used |
| ACQUISITION | exp        | hist       | 0.008    |
| sw          | 25125.6    | pu90       | 18.600   |
| at          | 1.198      | dtfa       | 26.000   |
| np          | 60270      | FLAGS      |          |
| fb          | 13600      | fl         | n        |
| bs          | 16         | in         | n        |
| dl          | 1.000      | dp         | y        |
| nt          | 2000       | hs         | nm       |
| ct          | 240        | PROCESSING |          |
| th          |            | tb         | 2.00     |
| tn          | C13        | fn         | 65536    |
| sfrq        | 100.624    | DISPLA     |          |
| torf        | 1536.3     | sp         | -1512.3  |
| tpwr        | 61         | wp         | 25124.9  |
| pw          | 9.390      | rfl        | 3276.0   |
| DECOUPLER   | H1         | rfd        | 7264.9   |
| dn          | 0          | rp         | -54.9    |
| dor         | 0          | lp         | -271.4   |
| dm          | yyv        | PLOT       |          |
| scm         | w          | wc         | 250      |
| dpwr        | 42         | sc         | 0        |
| dof         | 8800       | vs         | 13       |
| th          |            | th         | 1        |
| nm          | no         | ph         |          |

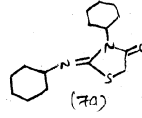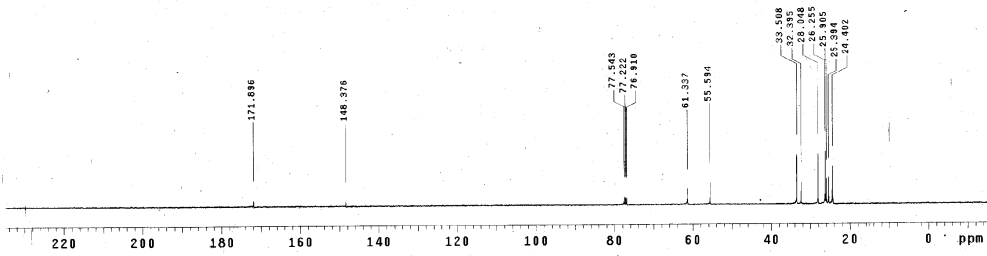



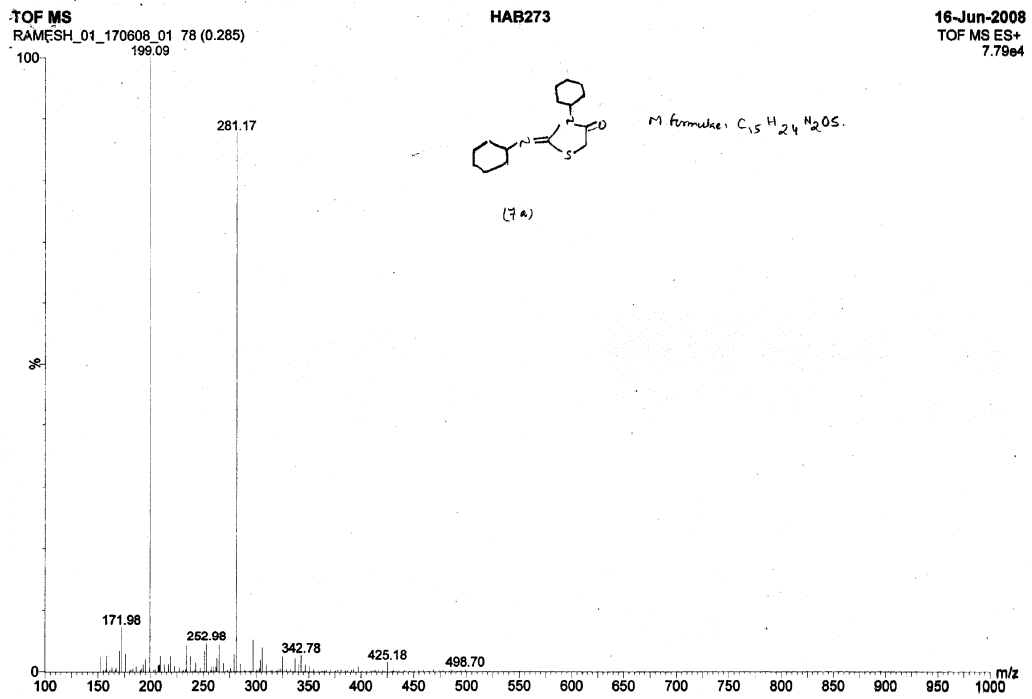

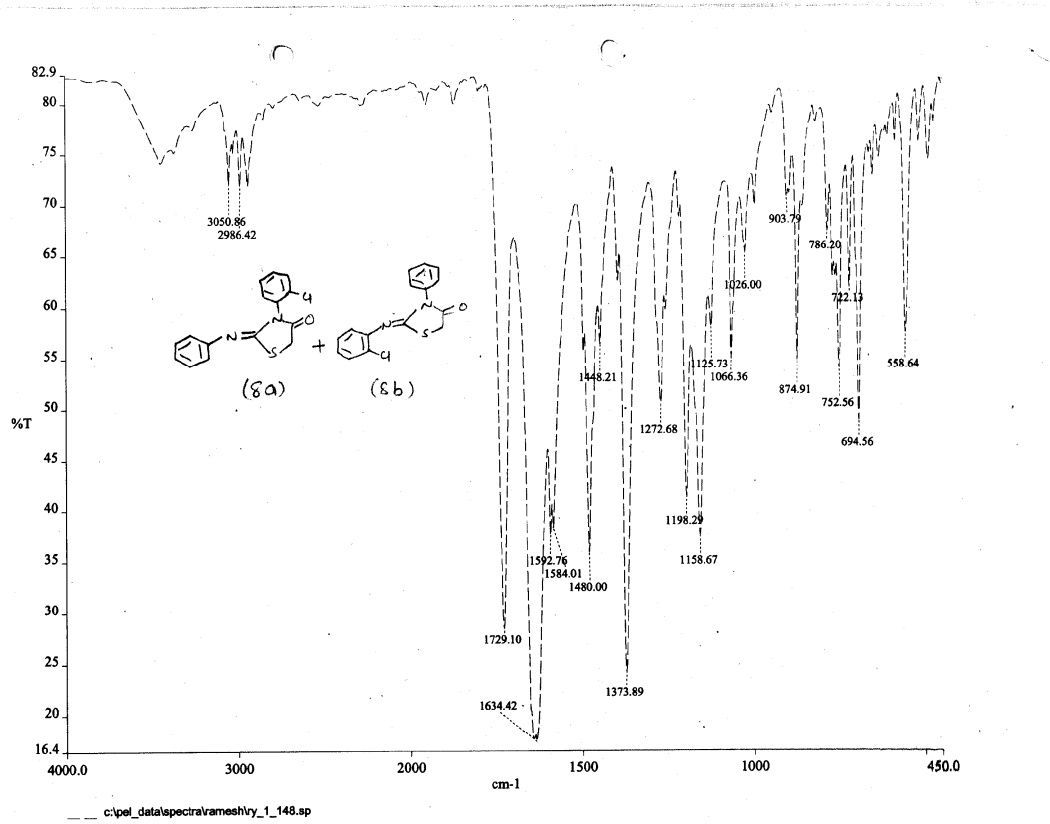



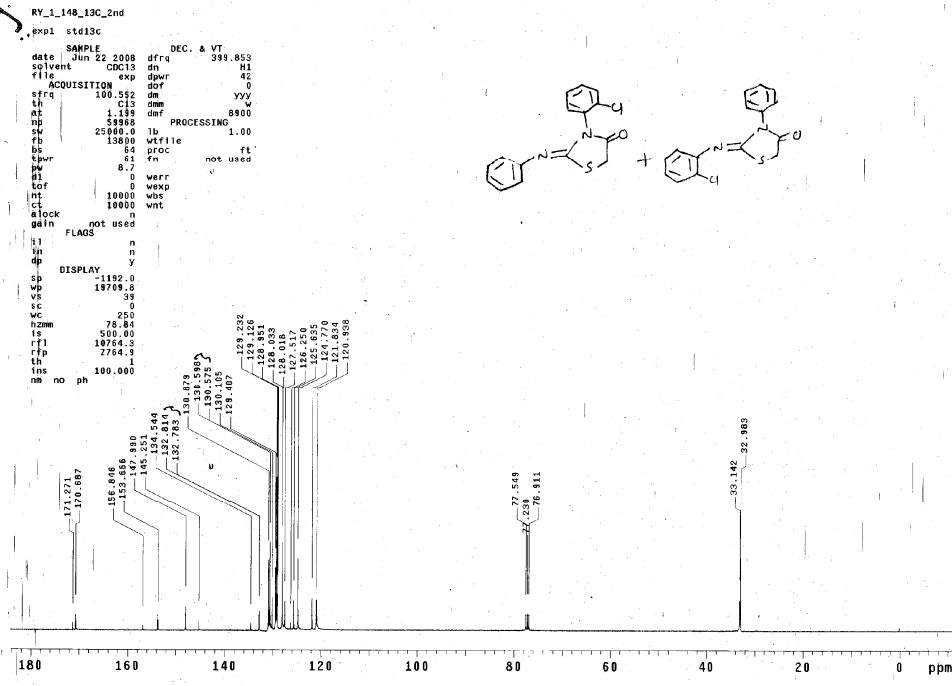

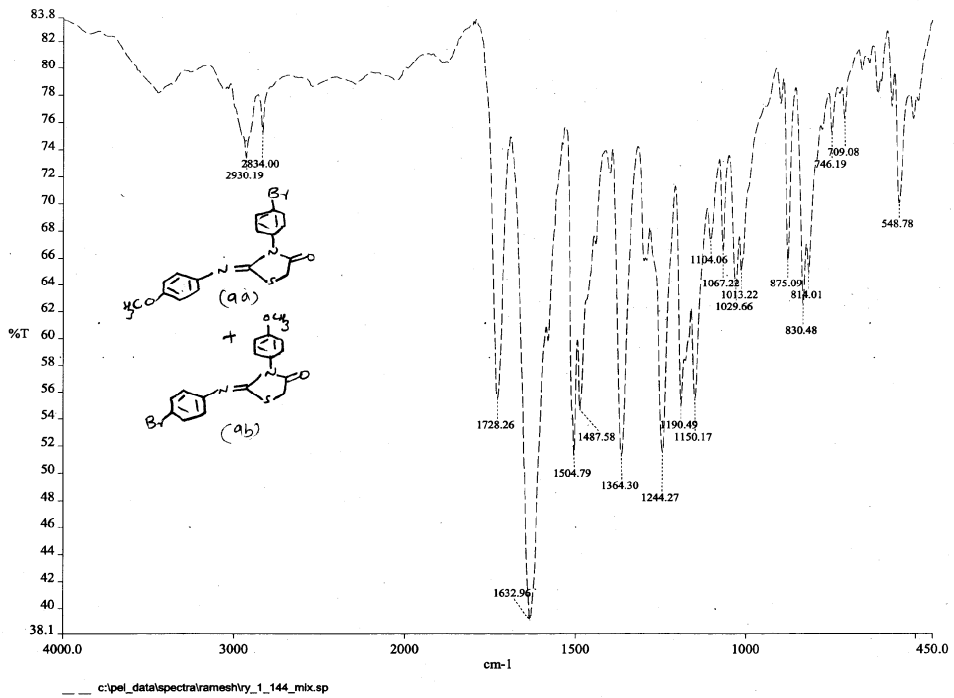

```
RY_1144_mix
exp1 ,stdih
SAMPLE          DEC. & VT
date            Jun  9 2008  dfrq      319.023
solvent         CDCl3    dn          H1
file            exp      dpwr        30
ACQUISITION    exp      dof         0
sfrq           399.653  de          nmh
kn             1.983    dm         200
ns             23936    df         200
np             6096.0   wfile        ft
sq             not used proc        not used
sb             4
tpwr           57
pw             7.0      werr
sl             1.000    wexp
tof            0        wbs
ms             32      wnt
ct             32
elock          n
gain           not used
f1             -n
f2             n
f3             y
DISPLAY
sp             -300.1
wp             6005.6
vc             39
sc             0
wc             250
hznm          24.02
f1             1130.00
f2             360.5
rfp            20
th             100.000
nm             cdc ph
```

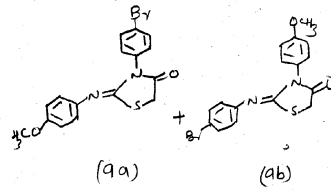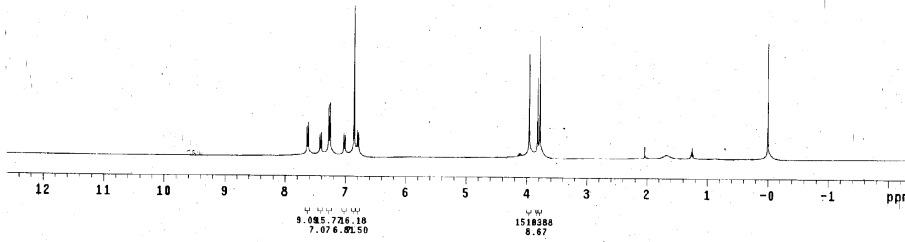

Ry-144-mix-13c

exp1 s2pu1

|             |            |            |          |
|-------------|------------|------------|----------|
| SAMPLE      |            | SPECIAL    |          |
| date        | Jun 4 2008 | temp       | not used |
| solvent     | CDCl3      | ggin       | not used |
| file        |            | spin       | not used |
| ACQUISITION |            | hst        | 0.008    |
| sw          | 25125.6    | pw90       | 18.600   |
| et          | 1.189      | alpha      | 20.000   |
| np          | 60270      | FLAGS      |          |
| fb          | 13800      | fl         | n        |
| bs          | 10         | in         | n        |
| d1          | 1.000      | dp         | y        |
| nt          | 6000       | hs         | nn       |
| ct          | 6000       | PROCESSING |          |
| IRANSMTTLER | id         | 2.00       |          |
| tn          | C13        | fn         | 65536    |
| strq        | 100.554    | DISPLAY    |          |
| tor         | 1598.3     | sp         | -486.3   |
| tpwr        | 61         | wp         | 21492.7  |
| pw          | 9.300      | rfl        | 9274.9   |
| DECOUPLER   |            | rfp        | 7784.9   |
| dn          | H1         | rp         | -37.7    |
| dof         | 0          | lp         | -397.2   |
| da          | yy         | W          |          |
| dmm         | yy         | wc         | 250      |
| dpwr        | 42         | sc         | 0        |
| def         | 0300       | vs         | 13       |
|             |            | th         | 2        |
|             |            | nm         | no ph    |

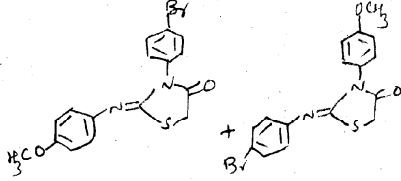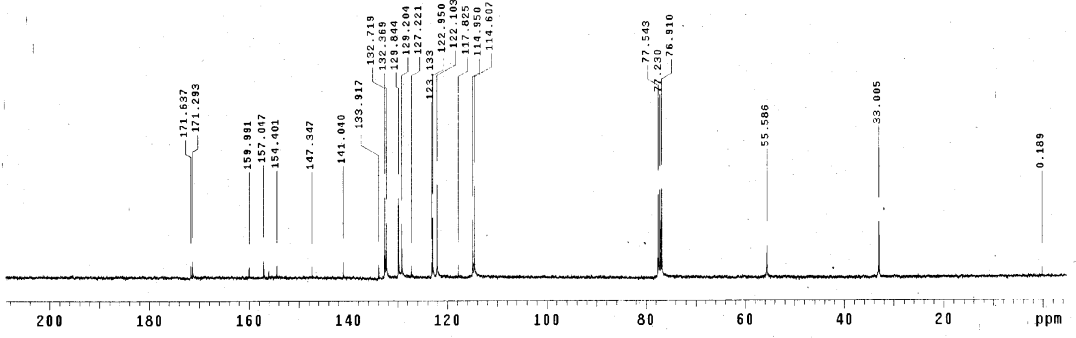

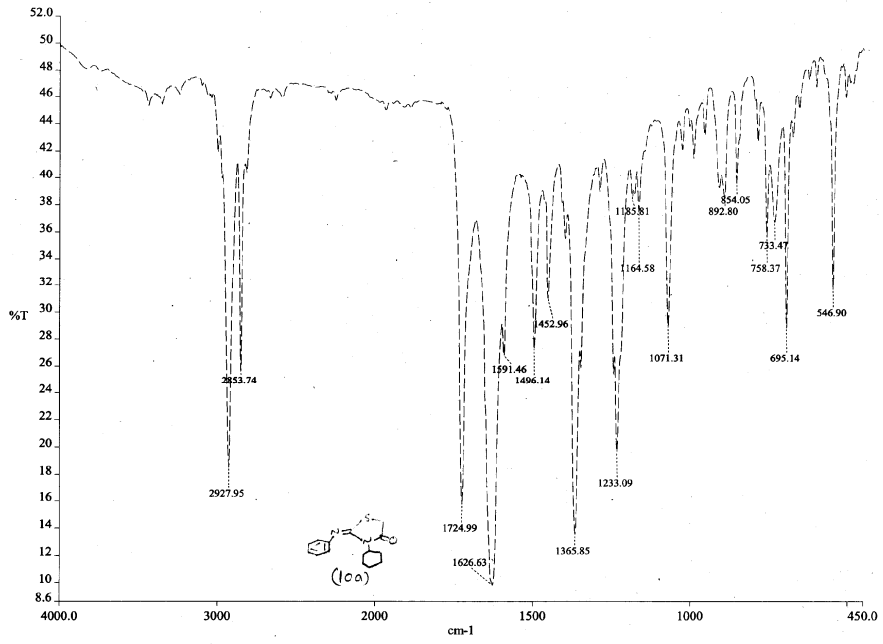

c:\pel\_data\spectra\ameshry\_1\_137.sp - TZ



```
RY_1137
exp1 stdih
SAMPLE
date May 19 2008 dfrq DEC. A VT 389.853
solvent CDC13 dn M1
file exp dpar 30
ACQUISITION dof 0
sfreq 389.853 dm rnm
tn H1 dm
at 1.389 dmf 200
np 2356 PROCESSING
sw 6008.0 wtfile ft
fb not used proc ft
bb 4 fn not used
lpwr 57
de 7.0 werr
H1 1.000 wexp
top 0 wbs
nt 32 wnt
ct 32
a lock n
gain not used
FLAG n
il n
in n
sp Y
DISPLAY
sb -582.1
wp 4984.8
ve 60
se 0
wf 250
hzam 18.34
fs 1901.11
rfi 988.8
rfg 0
ths 5
nm cdc ph
```

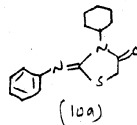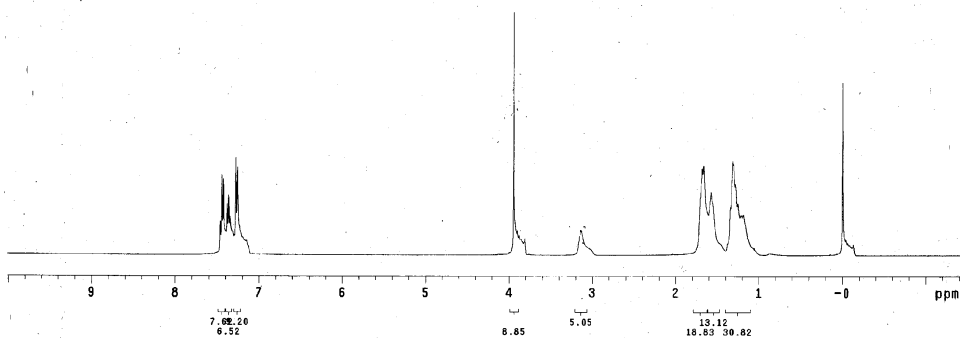

```
RV_L_137_130
expl st133c
SAMPLE
date May 20 2008      dfrs      see asc
solvent CDC13      dn      H1
file      180.552      dprv      45
ACQUISITION exp      dof      99
sfrs      1.130      dm      0
ln      1.013      dmm      8900
ql      2880      dnf      PROCESSING
sp      25000.0      lb      1.00
fb      13800      wffile
ls      32      proc      ft
tprc      81      fd      not used
dy      0
dl      0      wevr
tof      0      wekp
nt      2800      wsc
clock      544      wnt
goin      not used
ii      n
dp      y
DISPLAY
sp      3003.7
wp      2433.2
vs      0.4
s      0
wc      250
norm      100.00
ls      500.00
rfi      3004.5
rff      0
th      2
ins no ph 100.000
```

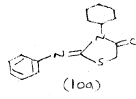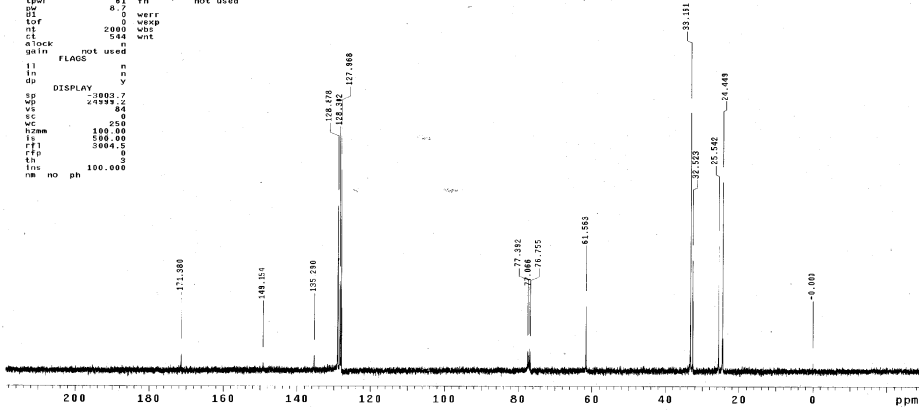

TOF MS  
RAMESH\_07 275 (11.442)

HAB273

19-Jun-2008  
2: TOF MS ES+  
1.67e4

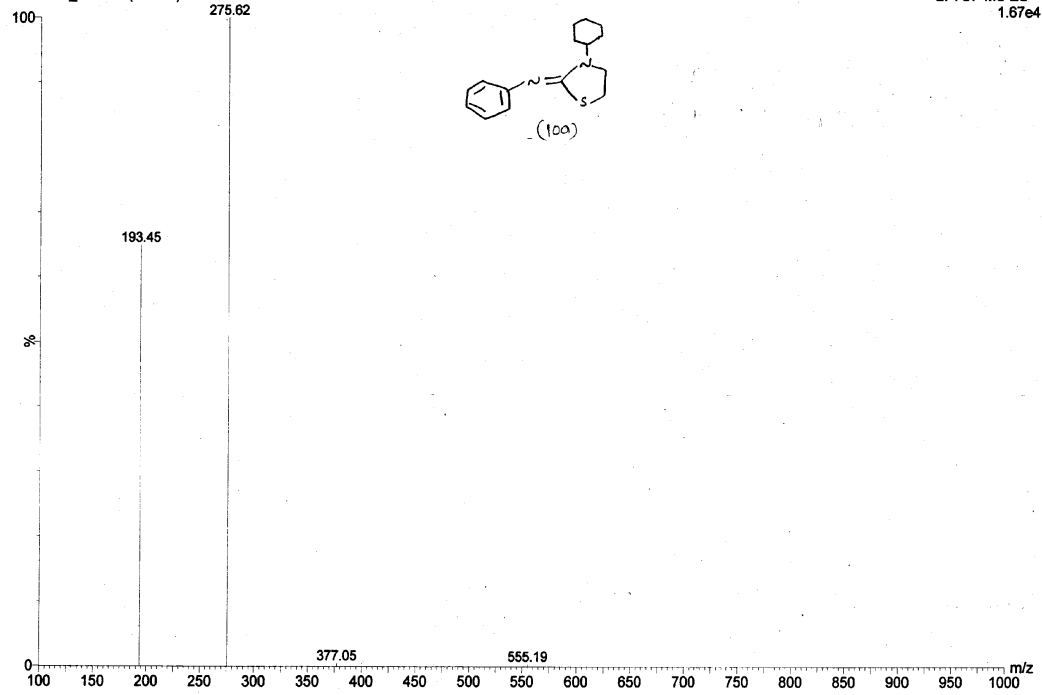

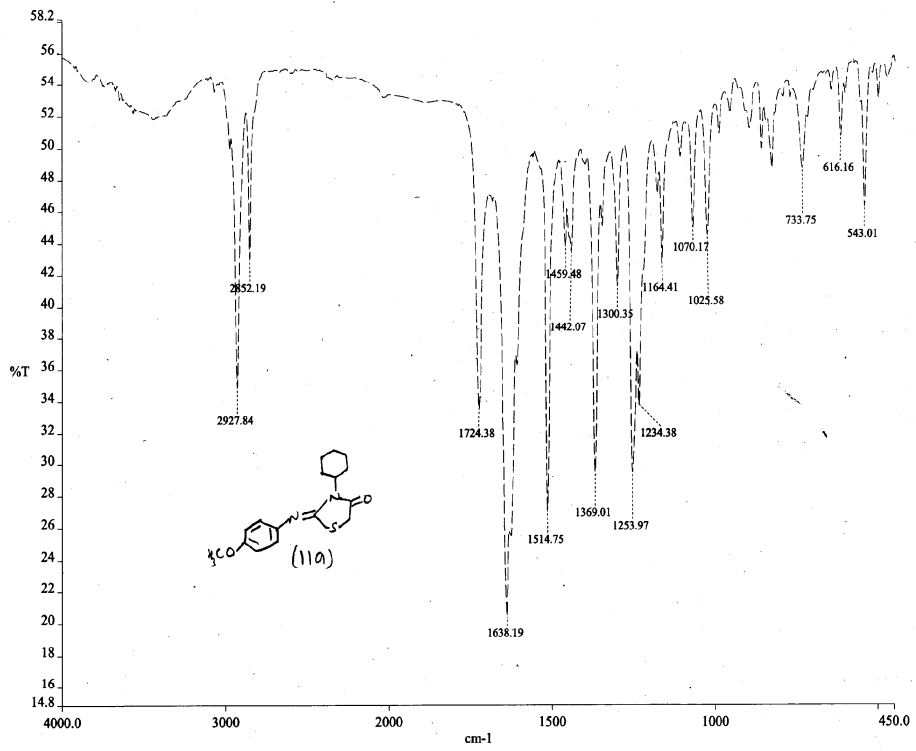

c:\pel\_data\spectra\amesh\ry\_1\_141.sp - TZ



```
RV_1_141_13C
exptl std13c
SAMPLE
date May 20 2008 dfrq 399.853
solvent CDCl3 dn H1
file exp dpr 52
ACQUISITION dof 0
dfrq 100.552 ds yyy
tn C13 dnm w
at 1.139 dmf 8800
np 59968 PROCESSING 1.00
sw 25000.0 lb
fb 1380.0 wfile
bs 32 proc not used
tpr 6.1 tn
dvr 8.7 werr
d1 0
tof 0 wexp
nt 2000 wds
ct 980 wnt
alock n
gain not used
FLAGS
it n
in n
dp n
SP DISPLAY y
sp 2999.1
wp 2999.2
ve 47
sc 0
wc 250
hzmm 100.00
is 500.00
rf1 2999.8
rff 0
tn 5
ins 100.000
nm no ph
```

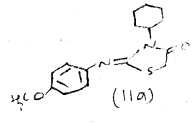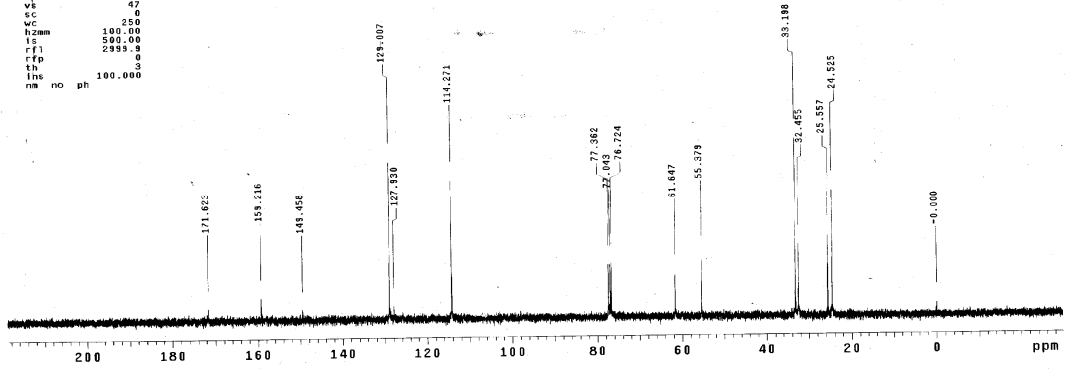

TOF\_MS  
RAMESH\_08 217 (9.039)

HAB273

19-Jun-2008  
2: TOF MS ES+  
6.98e5

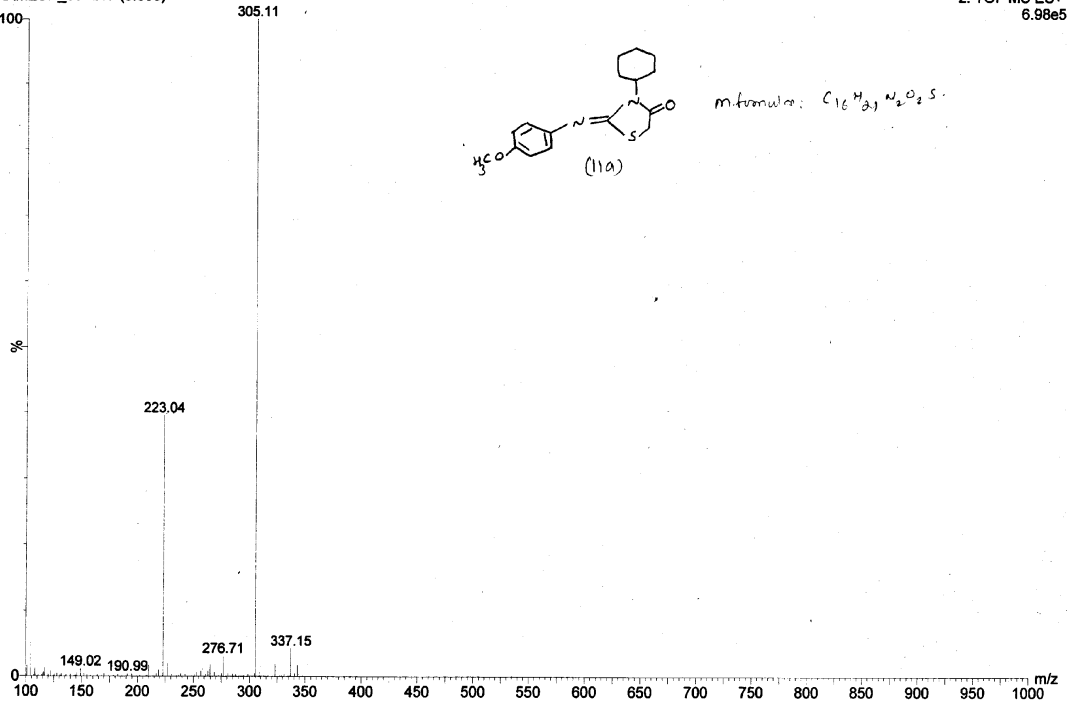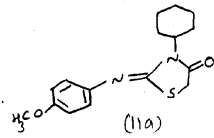

molecular:  $C_{16}H_{21}N_2O_2S$

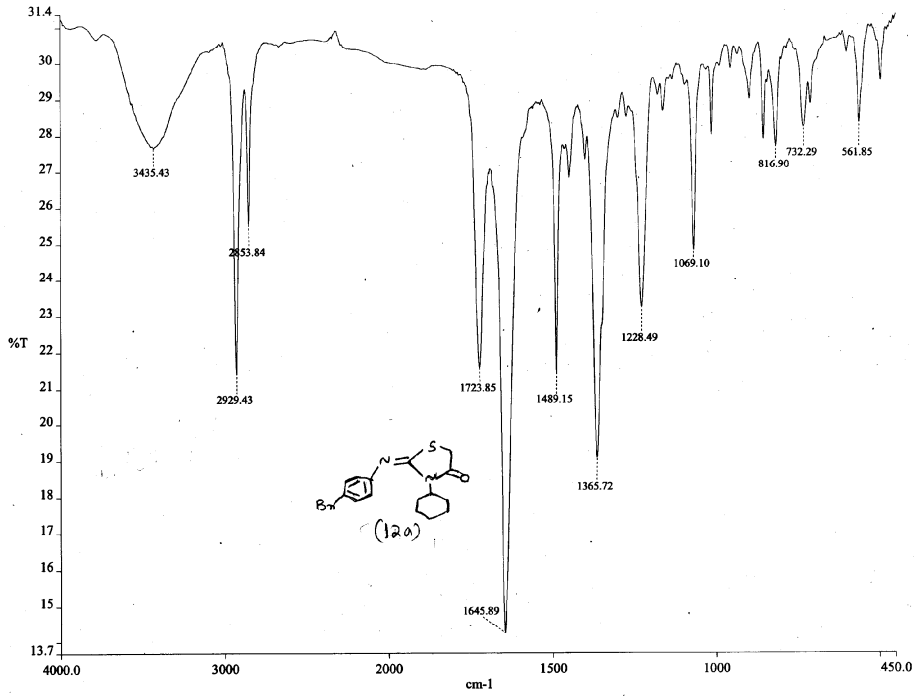

c:\pel\_data\spectra\rameshry\_1\_147.sp

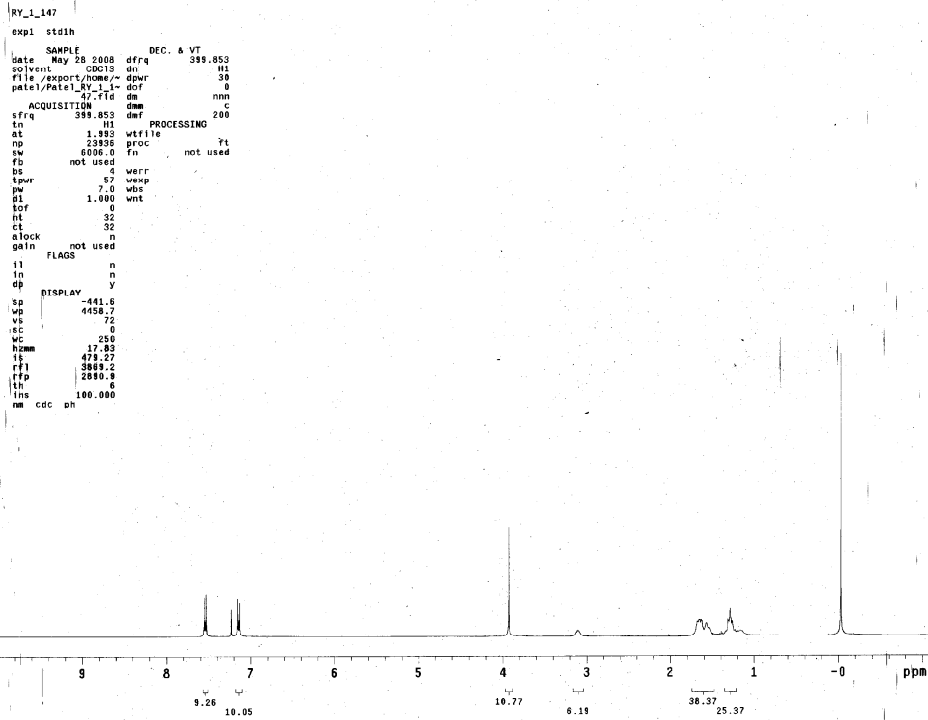



```
RV_1_147_19C
expl stat3c
SAMPLE DEC. & VT
date May 30 2008 dfrq 399.853
solvent CDCl3 dn 42
file ACQUISITION 819 dpr 0
tn 1.133 ds yyv
et C13 dnm 890
np 59888 in PROCESSING 1.00
sw 25000.0 lb
fb 13800 wffile ft
ds 16 utoc
tpwr 81 fn not used
pw 8.7
cl 0 werr
rt 3000 wexp
ci 1040 wnt
elock n
gain not used
FLAG n
in n
dp Y
DISPLAY
sp 1826.8
ws 22370.3
vs 28
sc 0
wc 250
h2m 89.48
ls 500.00
rfi 10746.3
fip 7764.3
th 2
ins 100.000
nm no ph
```

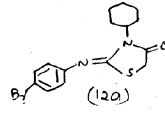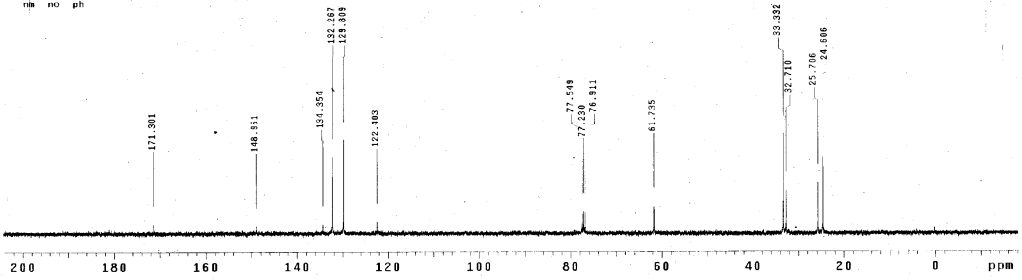

TOF MS  
RAMESH\_10 357 (14.861)

HAB273

19-Jun-2008  
2: TOF MS ES+  
1.40e6

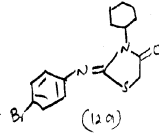

molecular:  $C_{15}H_{17}BrN_2O_2$

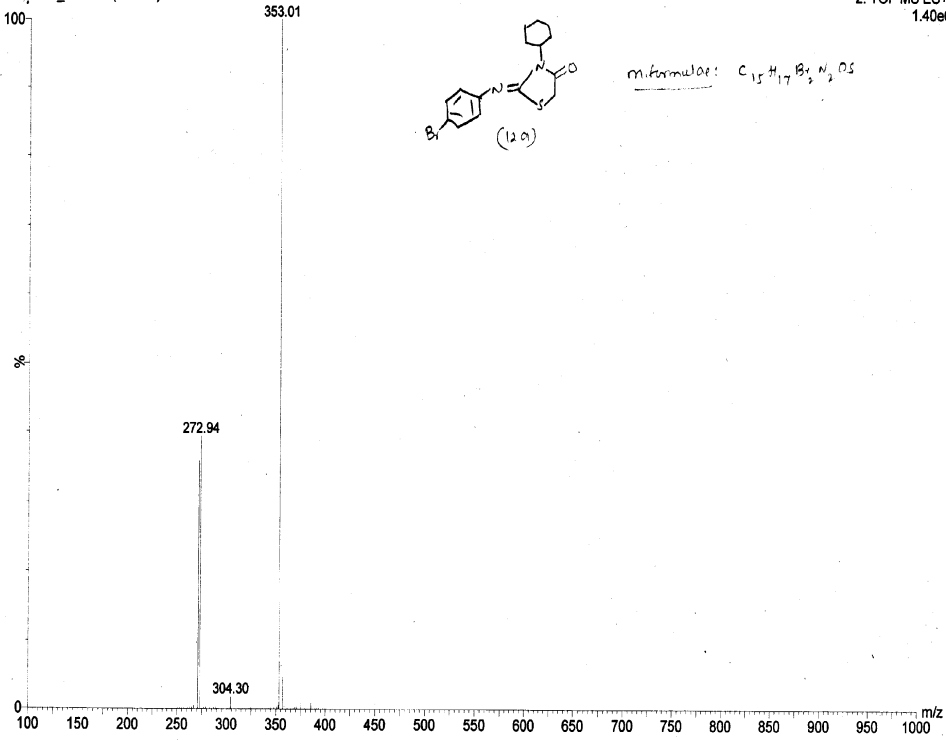

Supplement: b807775d.pdf [file b807775d.pdf]
